# Supplementary material
Source: PubMed Central journal article supplement (PMC9429803)
Supplement: NIHMS1820844-supplement-3.pdf [file NIHMS1820844-supplement-3.pdf]

## APPENDIX I SUPPLEMENTARY MULTIMEDIA

Additional visualizations of 3D faces generated by the NF model are provided in the following multimedia files:

`Ageing_Modes.gif`: Maximally probable faces produced by the proposed NF model for different syndrome (rows) and sex (columns) conditions. The age condition is increasing with time.

`Ageing_Samples.gif`: Random samples from the proposed NF model with syndrome condition fixed to unaffected. The faces on the left half are female and those on the right half are male. The age condition is increasing with time. Samples were drawn from the latent prior with a temperature of 0.8.

## APPENDIX II DEMOGRAPHICS

Figure 8 shows a detailed demographic breakdown of the 3D facial scan data.

## APPENDIX III CONFUSION ANALYSIS

Table III shows, for each syndrome, the most common erroneous MAP diagnosis and its frequency from the cross validated syndrome inference experiment. In general, most confusion occurs among different syndrome classes. Unaffected patients are rarely confused for syndromic and syndromic patients are rarely confused for unaffected.

TABLE III

FOR EACH SYNDROME, THE MOST COMMON ERRONEOUS SYNDROME DIAGNOSIS AND ITS FREQUENCY FROM THE CROSS VALIDATED SYNDROME INFERENCE EXPERIMENT.

| Syndrome                         | Most Frequent Error   | Error Rate (%) |
|----------------------------------|-----------------------|----------------|
| 1p36 Del                         | Rett                  | 11.5           |
| 22q 11 2 Del                     | Ehlers Danlos         | 9.2            |
| 4p Del Wolff-Hirschhorn          | 1p36 Del              | 8.9            |
| 5p Del Cri du Chat               | Ehlers Danlos         | 4.7            |
| Achondroplasia                   | Neurofibromatosis     | 4.3            |
| Angelman                         | Rett                  | 12.9           |
| CHARGE                           | Neurofibromatosis     | 5.4            |
| Cardiofaciocutaneous             | Neurofibromatosis     | 14.3           |
| Cleft Lip Palate                 | 22q 11 2 Del          | 10.5           |
| Cockayne                         | Russell Silver        | 5.0            |
| Coffin Siris                     | Turner                | 8.3            |
| Cohen                            | Rett                  | 9.9            |
| Cornelia de Lange                | Pierre Robin Sequence | 6.1            |
| Costello                         | Cardiofaciocutaneous  | 15.6           |
| Crouzon                          | Marfan                | 22.3           |
| Down                             | Noonan                | 6.6            |
| Ehlers Danlos                    | Neurofibromatosis     | 13.3           |
| Fragile X                        | Stickler              | 12.2           |
| Goldenhar                        | Marfan                | 8.3            |
| Jacobsen                         | Phelan McDermid       | 9.1            |
| Joubert                          | Cleft Lip Palate      | 7.6            |
| Kabuki                           | Turner                | 11.8           |
| Klinefelter                      | Fragile X             | 8.2            |
| Loeys Dietz                      | Ehlers Danlos         | 17.0           |
| Marfan                           | Ehlers Danlos         | 18.5           |
| Moebius                          | Cleft Lip Palate      | 13.3           |
| Mucopolysaccharidosis            | Fragile X             | 7.2            |
| Neurofibromatosis                | Klinefelter           | 5.4            |
| Noonan                           | Neurofibromatosis     | 16.1           |
| Osteogenesis Imperfecta          | Ehlers Danlos         | 25.3           |
| Pallister Killian                | Jacobsen              | 6.1            |
| Phelan McDermid                  | Ehlers Danlos         | 7.4            |
| Pierre Robin Sequence            | 22q 11 2 Del          | 12.1           |
| Pitt Hopkins                     | 22q 11 2 Del          | 11.8           |
| Prader-Willi                     | Cleft Lip Palate      | 11.6           |
| Rett                             | Ehlers Danlos         | 7.9            |
| Rhizomelic Chondro Punctata      | Noonan                | 5.9            |
| Rubinstein Taybi                 | Cohen                 | 6.2            |
| Russell Silver                   | Turner                | 17.4           |
| Smith Lemli Opitz                | Coffin Siris          | 12.5           |
| Sotos                            | Marfan                | 8.8            |
| Stickler                         | Ehlers Danlos         | 13.5           |
| Treacher Collins                 | Neurofibromatosis     | 9.2            |
| Trisomy 18                       | CHARGE                | 11.1           |
| Turner                           | 22q 11 2 Del          | 4.9            |
| Unaffected                       | Ehlers Danlos         | 2.5            |
| Williams                         | Neurofibromatosis     | 3.9            |
| X Linked-Hypohidrotic Ectodermal | Noonan                | 10.3           |

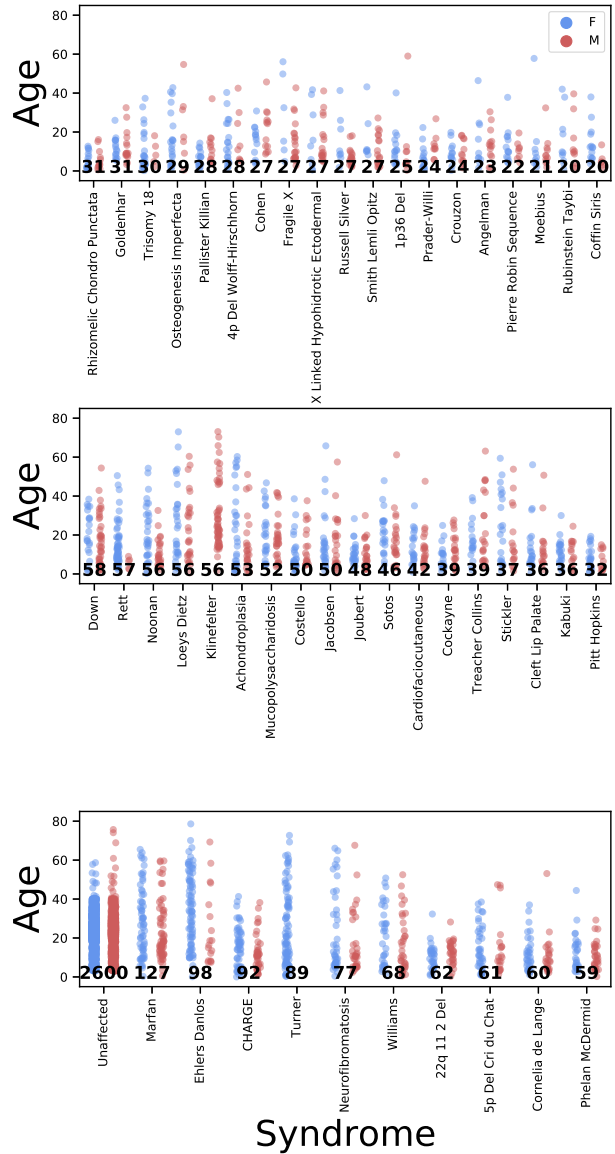

Fig. 8. The joint distribution of patient age, sex, and genetic syndrome in the 3D facial scan data.
